# Supplementary material for: Inositol 1,4,5-trisphosphate receptor type 1 autoantibodies in paraneoplastic and non-paraneoplastic peripheral neuropathy
Source: Springer Nature journal article supplement (doi:10.1186/s12974-016-0737-x), 2016-10-24
Supplement: MOESM1 [file 10982362]

**Additional file: Table S1**

Jarius S, Ringelstein M, Haas J, Sherysheva II, Komorowski L, Fechner K, Wandinger KP, Albrecht P, Hefter H, Moser A, Neuen-Jacob E, Hartung HP, Wildemann B, Aktas O. Inositol 1,4,5-trisphosphate receptor type 1 autoantibodies in paraneoplastic and non-paraneoplastic peripheral neuropathy. J Neuroinflammation 2016; 13:278; DOI: 10.1186/s12974-016-0737-x.

| <b>Tumour type</b>                                                  | <b>References</b> |
|---------------------------------------------------------------------|-------------------|
| Lung cancer                                                         | [1-12]            |
| Hodgkin disease                                                     | [5, 13-21]        |
| Non-Hodgkin lymphomas and leukaemias                                | [4, 22-58]        |
| Melanoma                                                            | [59, 60]          |
| Breast cancer                                                       | [61]              |
| Hepatocellular carcinoma                                            | [62]              |
| Oesophageal carcinoma                                               | [63]              |
| Gastric adenocarcinoma                                              | [64]              |
| Colorectal cancer                                                   | [65, 66]          |
| Gall bladder adenocarcinoma                                         | [67-70]           |
| Urinary bladder cancer                                              | [71]              |
| Mesothelioma                                                        | [72]              |
| Endometrial carcinoma                                               | [73]              |
| Epidermoid cancer of the tongue                                     | [68]              |
| Parathyroid adenoma                                                 | [74]              |
| Pancreatic cancer (including one of neuroendocrine differentiation) | [38, 75]          |
| Disseminated squamous cell carcinoma of unknown origin              | [76]              |

**Table S1.** List of tumours previously reported in association with Guillain-Barré syndrome

## References

1. Naveed S, Okoli K, Hollingsworth J, Kasmani R: **Guillain-Barre syndrome as a paraneoplastic manifestation of small-cell carcinoma of lung.** *South Med J* 2010, **103**:156-158.
2. Watanuki S, Kinoshita K, Oda A, Kobayashi H, Satoh H, Tokuda Y: **Occam's Razor or Hickam's dictum: a paraneoplastic or coincidental occurrence of lung cancer and Guillain-Barre syndrome.** *Intern Med* 2014, **53**:1569-1573.
3. Nokura K, Nagamatsu M, Inagaki T, Yamamoto H, Koga H, Sugimura K, Yoshida M, Hashizume Y: **Acute motor and sensory neuropathy associated with small-cell lung cancer: a clinicopathological study.** *Neuropathology* 2006, **26**:329-337.
4. Defanti CA, Brambilla A, Eri LC, Tredici G: **[Acute polyradiculoneuritis (Guillain-Barre) associated with the syndrome of inappropriate ADH secretion (Schwartz-Barter): initial symptom of pulmonary neoplasia].** *Riv Neurobiol* 1984, **30**:303-308.
5. Klingon GH: **The Guillain-Barré Syndrome Associated with Cancer.** *Cancer* 1965, **18**:157-163.
6. Tuzun E, Kinay D, Hacohen Y, Aysal F, Vincent A: **Guillain-Barre-like syndrome associated with lung adenocarcinoma and CASPR2 antibodies.** *Muscle Nerve* 2013, **48**:836-837.
7. Ferruffino E, Camarasa A, Chiner E: **Guillain-Barre syndrome as an initial manifestation of small cell lung carcinoma.** *Arch Bronconeumol* 2011, **47**:107-108.
8. Eimil M, Benito-Leon J: **Guillain-Barre-like syndrome heralding small-cell lung cancer.** *Eur J Neurol* 2007, **14**:e15-16.
9. Cicero G, Fulfaro F, Caraceni A, Arcara C, Badalamenti G, Intrivici C, Gebbia N: **A case of Guillain-Barre syndrome in a patient with non small cell lung cancer treated with chemotherapy.** *J Chemother* 2006, **18**:325-327.
10. Togashi K, Shinohara H, Wakabayashi T, Fujita S, Sato K: **[Tetraplegia and respiratory failure due to carcinomatous neuropathy in the early postoperative period of a lung cancer patient: report of a case].** *Kyobu Geka* 2005, **58**:495-498.
11. Lopez Garcia E, Anton Garrido T, Lopez Garcia L, Ramirez Guedes J, Sanabria Gomez F: **[Bronchial carcinoma with a clinical syndrome of Guillain-Barre type of polyradiculitis].** *Rev Clin Esp* 1959, **72**:186-189.

12. Tescola F: **[Case of histiocytic leukemia with initial neurological manifestations of Guillain-Barre syndrome type]**. *Clin Pediatr (Bologna)* 1958, **40**:977-989.
13. Hughes CL, Yorio JT, Kovitz C, Oki Y: **Treatment decisions in a man with Hodgkin lymphoma and Guillain-Barre syndrome: a case report**. *J Med Case Rep* 2014, **8**:455.
14. Apjok E, Marosi A, Magyarosy E: **[Guillain-Barre syndrome in patients treated for Hodgkin disease]**. *Orv Hetil* 2003, **144**:1039-1040.
15. Maslovsky I, Volchek L, Blumental R, Ducach A, Lugassy G: **Persistent paraneoplastic neurologic syndrome after successful therapy of Hodgkin's disease**. *Eur J Haematol* 2001, **66**:63-65.
16. Correale J, Monteverde DA, Bueri JA, Reich EG: **Peripheral nervous system and spinal cord involvement in lymphoma**. *Acta Neurol Scand* 1991, **83**:45-51.
17. Cameron DG, Howell DA, Hutchison JL: **Acute peripheral neuropathy in Hodgkin's disease; report of a fatal case with histologic features of allergic neuritis**. *Neurology* 1958, **8**:575-577.
18. Lisak RP, Mitchell M, Zweiman B, Orrechio E, Asbury AK: **Guillain-Barre syndrome and Hodgkin's disease: three cases with immunological studies**. *Ann Neurol* 1977, **1**:72-78.
19. Julien J, Vital C, Aupy G, Lagueny A, Darriet D, Brechenmacher C: **Guillain-Barre syndrome and Hodgkin's disease--ultrastructural study of a peripheral nerve**. *J Neurol Sci* 1980, **45**:23-27.
20. Amundson DE, Goodman JC: **Hodgkin's disease in association with Guillain-Barre-Strohl syndrome: case report**. *Mil Med* 1983, **148**:512-513.
21. Cuttner J, Meyer R: **Guillain-Barre syndrome in a patient with Hodgkin's disease**. *Mt Sinai J Med* 1978, **45**:415-417.
22. Vallat JM, De Mascarel HA, Bordessoule D, Jauberteau MO, Tabaraud F, Gelot A, Vallat AV: **Non-Hodgkin malignant lymphomas and peripheral neuropathies--13 cases**. *Brain* 1995, **118 ( Pt 5)**:1233-1245.
23. Carmona A, Alonso JD, de las Heras M, Navarrete A: **Guillain-Barre syndrome in a patient with diffuse large B-cell lymphoma, and rituximab maintenance therapy. An association beyond anecdotal evidence?** *Clin Transl Oncol* 2006, **8**:764-766.
24. Ozkan A, Taskapilioglu O, Bican A, Ozkocaman V, Ozturk H, Ozkalemkas F, Ali R: **Hairy cell leukemia presenting with Guillain-Barre syndrome**. *Leuk Lymphoma* 2007, **48**:1048-1049.
25. Mailander V, Gleisner B, Blau IW, Thiel E: **Guillain-Barre-Strohl syndrome unraveled as paraneoplastic syndrome of B-cell acute lymphoblastic leukemia in a patient with preceding**

- common variable immunodeficiency syndrome with Evans syndrome.** *Leuk Lymphoma* 2004, **45**:189-192.
26. Zuk E, Nowacki P, Fabian A: **Guillain-Barre syndrome in patient with Burkitt's lymphoma and type 2 diabetes mellitus.** *Folia Neuropathol* 2001, **39**:281-284.
27. Wada M, Kurita K, Tajima K, Kawanami T, Kato T: **A case of inflammatory demyelinating polyradiculoneuropathy associated with T-cell lymphoma.** *Acta Neurol Scand* 2003, **107**:62-66.
28. Rohmer F, Mengus M, Buchheit F: **[Paraneoplastic neuropathy of the type of the Guillain-Barre syndrome in a patient with solitary myeloma].** *Rev Otoneuroophthalmol* 1962, **34**:97-107.
29. Tzachanis D, Hamdan A, Uhlmann EJ, Joyce RM: **Successful treatment of refractory Guillain-Barre syndrome with alemtuzumab in a patient with chronic lymphocytic leukemia.** *Acta Haematol* 2014, **132**:240-243.
30. Rajeswari B, Krishnan S, Sarada C, Kusumakumary P: **Guillain-Barre syndrome with acute lymphoblastic leukemia.** *Indian Pediatr* 2013, **50**:791-792.
31. Machida H, Shinohara T, Hatakeyama N, Okano Y, Nakano M, Tobiume M, Naruse K, Iwahara Y, Ogushi F: **CD5-positive diffuse large B cell lymphoma infiltrating the central nervous system presenting Guillain-Barre-like syndrome after chemotherapy.** *J Clin Exp Hematop* 2012, **52**:199-204.
32. Brigo F, Balter R, Marradi P, Ferlisi M, Zaccaron A, Fiaschi A, Frasson E, Bertolasi L: **Vincristine-related neuropathy versus acute inflammatory demyelinating polyradiculoneuropathy in children with acute lymphoblastic leukemia.** *J Child Neurol* 2012, **27**:867-874.
33. Polo-Romero FJ, Sanchez-Beteta P, Perona-Buendia P, Perez-Garcia AM: **Guillain-Barre syndrome as first presentation of non-Hodgkin lymphoma.** *Neurologia* 2012, **27**:511-513.
34. Terui K, Takahashi Y, Sasaki S, Kudo K, Kamio T, Ito E: **Guillain-Barre syndrome mimicking acute methotrexate-associated encephalopathy in an adolescent patient with lymphoblastic lymphoma.** *J Pediatr Hematol Oncol* 2010, **32**:615-616.
35. Seffo F, Daw HA: **Non-Hodgkin lymphoma and Guillain-Barre syndrome: a rare association.** *Clin Adv Hematol Oncol* 2010, **8**:201-203.
36. Terenghi F, Ardolino G, Nobile-Orazio E: **Guillain-Barre syndrome after combined CHOP and rituximab therapy in non-Hodgkin lymphoma.** *J Peripher Nerv Syst* 2007, **12**:142-143.

37. Wanschitz J, Dichtl W, Budka H, Loscher WN, Boesch S: **Acute motor and sensory axonal neuropathy in Burkitt-like lymphoma.** *Muscle Nerve* 2006, **34**:494-498.
38. Magne N, Foa C, Castadot P, Otto J, Birtwisle-Peyrottes I, Thyss A: **[Guillain-Barre syndrome and non-Hodgkin's lymphoma. Report of one case and review of literature].** *Rev Med Brux* 2005, **26**:108-111.
39. D'Arena G, Vigliotti ML, Pizza V, Tartarone A, Volpe G, Iodice G, Di Renzo N: **Guillain-Barre syndrome complicating mobilization therapy in a case of B-cell chronic lymphocytic leukemia.** *Leuk Lymphoma* 2004, **45**:1489-1490.
40. Vembu P, Al-Shubaili A, Al-Khuraibet A, Kreze O, Pandita R: **Guillain-Barre syndrome in a case of acute lymphoblastic leukaemia. A case report.** *Med Princ Pract* 2003, **12**:272-275.
41. Aral YZ, Gursel T, Ozturk G, Serdaroglu A: **Guillain-Barre syndrome in a child with acute lymphoblastic leukemia.** *Pediatr Hematol Oncol* 2001, **18**:343-346.
42. Sarmiento MA, Neme D, Fornari MC, Bengio RM: **Guillain-Barre syndrome following 2-chlorodeoxyadenosine treatment for Hairy Cell Leukemia.** *Leuk Lymphoma* 2000, **39**:657-659.
43. Re D, Schwenk A, Hegener P, Bamborschke S, Diehl V, Tesch H: **Guillain-Barre syndrome in a patient with non-Hodgkin's lymphoma.** *Ann Oncol* 2000, **11**:217-220.
44. Geetha N, Hussain BM, Lali VS, Nair MK, Kumar BS: **Guillain-Barre syndrome occurring as a complication of acute nonlymphoblastic leukemia.** *Am J Med* 1999, **107**:100-101.
45. Gutknecht DR: **Guillain-Barre syndrome and SIADH in a patient with chronic lymphocytic leukemia.** *J Am Board Fam Pract* 1998, **11**:237-239.
46. Phan TG, Manoharan A, Pryor D: **Relapse of central nervous system Burkitt's lymphoma presenting as Guillain-Barre syndrome and syndrome of inappropriate ADH secretion.** *Aust N Z J Med* 1998, **28**:223-224.
47. Schwarzer A, Schulze E, Leiblein S, Krahl R, Kubel M, Bartram C, Edelmann J, Sack U, Helbig W: **Guillain Barre syndrome, a possible side effect of buffy coat transfusion and IFN alpha therapy in relapsed CML after bone marrow transplantation.** *Ann Oncol* 1995, **6**:617.
48. Jackson M: **Guillain-Barre syndrome in a patient with chronic lymphocytic leukaemia.** *Postgrad Med J* 1993, **69**:832-833.

49. Rodrigues A, Monteiro A, Viana J, Macedo A, Graca F, Sena A: **Acute non-lymphoblast leukaemia presenting as a Guillain-Barre syndrome.** *J Neurol Neurosurg Psychiatry* 1993, **56**:936-937.
50. Tayal SC, Rowbotham DS, Bansal SK: **Guillain-Barre syndrome in a patient with hairy cell leukaemia.** *J R Soc Med* 1991, **84**:238-239.
51. Kurata H, Hirai M, Miwa A, Murai Y, Mori M: **[B-cell non-Hodgkin's lymphoma associated with lactic acidosis, recurrent acute tumor lysis syndrome, and at the end stage, Guillain-Barre syndrome].** *Nihon Naika Gakkai Zasshi* 1989, **78**:1765-1770.
52. Phanthumchinda K, Intragumtornchai T, Kasantikul V: **Guillain-Barre syndrome and optic neuropathy in acute leukemia.** *Neurology* 1988, **38**:1324-1326.
53. Mactier RA, Khanna R: **Guillain-Barre syndrome in kappa light chain myeloma.** *South Med J* 1987, **80**:1054-1055.
54. Norman M, Elinder G, Finkel Y: **Vincristine neuropathy and a Guillain-Barre syndrome: a case with acute lymphatic leukemia and quadriparesis.** *Eur J Haematol* 1987, **39**:75-76.
55. Taillan B, Pedinielli FJ, Blanc AP: **[Association of Waldenstrom's disease and Guillain Barre syndrome].** *Presse Med* 1985, **14**:844.
56. Sahadevan MG, Raman PT, Hoon RS: **Landry-Guillain-Barre syndrome complicating lymphosarcoma. A case report.** *J Assoc Physicians India* 1969, **17**:215-216.
57. Powles RL, Malpas JS: **Guillain-Barre syndrome associated with chronic lymphatic leukaemia.** *Br Med J* 1967, **3**:286-287.
58. Carcassi A, Gentili M, Pianigiani A: **[Guillain-Barre syndrome secondary to systemic reticulosarcomatosis].** *Atti Accad Fisiocrit Siena Med Fis* 1964, **13**:637-650.
59. Kraft Rovere R, Pires de Souza ME, Fernanda Hilgert S, Rodrigues Chamse Ddine Y, Silva de Lima A: **Melanoma metastasis to the gastric mucosa preceded by guillain-barre as a paraneoplastic syndrome.** *Gastrointest Cancer Res* 2013, **6**:150-151.
60. Ben Simon GJ, McCann JD, Barth N, Goldberg RA, Glasgow BJ, Straatsma BR: **Partial resolution of acute ascending motor polyneuropathy after enucleation of an eye with metastatic melanoma.** *Br J Ophthalmol* 2004, **88**:847.

61. Estrada Perez V, Arroyo Serrano S, Garcia Gonzalez C, Garcia Asensio JA, Gutierrez Marcos FM: **[Breast cancer associated with hypercalcemia and Guillain-Barre syndrome]**. *Rev Clin Esp* 1990, **187**:209-210.
62. Camdessanche JP, Antoine JC, Honnorat J, Vidal C, Petiot P, Convers P, Michel D: **Paraneoplastic peripheral neuropathy associated with anti-Hu antibodies. A clinical and electrophysiological study of 20 patients**. *Brain* 2002, **125**:166-175.
63. Zilli T, Allal AS: **Guillain-Barre syndrome as an atypical manifestation of an esophageal carcinoma**. *Neurol Sci* 2011, **32**:151-153.
64. Tola-Arribas MA, Canibano-Gonzalez MA: **[Guillain-Barre syndrome associated with gastric adenocarcinoma. Paraneoplastic origin or coincidence?]**. *Rev Neurol* 2001, **33**:797-798.
65. Christodoulou C, Anastasopoulos D, Visvikis A, Mellou S, Detsi I, Tsiakalos G, Pateli A, Klouvas G, Papadimitriou A, Skarlos DV: **Guillain-Barre syndrome in a patient with metastatic colon cancer receiving oxaliplatin-based chemotherapy**. *Anticancer Drugs* 2004, **15**:997-999.
66. Vatandoust S, Joshi R, Price TJ: **Guillain-Barre syndrome in colorectal cancer**. *Asia Pac J Clin Oncol* 2012, **8**:205-208.
67. Yoon JY, Nam TS, Kim MK, Hwang JE, Shim HJ, Cho SH, Chung IJ, Bae WK: **Acute inflammatory demyelinating polyradiculoneuropathy in a patient receiving oxaliplatin-based chemotherapy**. *Asia Pac J Clin Oncol* 2012, **8**:201-204.
68. Antoine JC, Mosnier JF, Absi L, Convers P, Honnorat J, Michel D: **Carcinoma associated paraneoplastic peripheral neuropathies in patients with and without anti-onconeural antibodies**. *J Neurol Neurosurg Psychiatry* 1999, **67**:7-14.
69. Phan TG, Hersch M, Zagami AS: **Guillain-Barre syndrome and adenocarcinoma of the gall bladder: a paraneoplastic phenomenon?** *Muscle Nerve* 1999, **22**:141-142.
70. Szoeki T, Hzfner A, Komar J: **[Cancer of the Gallbladder Causing Guillain-Barre Syndrome]**. *Ideggyogy Sz* 1963, **16**:321-327.
71. Lagrange E, Veran O, Besson G: **Pure motor relapsing Guillain-Barre syndrome associated with anti-GM1 antibodies revealing urinary bladder cancer**. *Eur J Neurol* 2007, **14**:e7.
72. Sights WP, Jr., Kam CC, Almond CF, Logue JT: **The Guillain-Barre syndrome associated with a mesothelioma. Case report**. *Mo Med* 1968, **65**:897-899 passim.



73. Tho LM, O'Leary CP, Horrocks I, Al-Ani A, Reed NS: **Guillain-Barre syndrome occurring after adjuvant chemo-radiotherapy for endometrial cancer.** *Gynecol Oncol* 2006, **100**:615-617.
74. Vallat JM, Poumier C, Dumas M, Gastinne H, Gobeaux R: **Guillain-Barre syndrome and parathyroid adenoma.** *Arch Neurol* 1982, **39**:322.
75. Yu TC, Omundsen M, Rahman H: **Pancreatic neuroendocrine tumour occurring with Guillain-Barre syndrome.** *ANZ J Surg* 2010, **80**:297.
76. Navani V, Webster D, Williams SK, Agranoff D: **Guillain-Barre syndrome as a paraneoplastic manifestation of disseminated squamous cell carcinoma.** *BMJ Case Rep* 2013, **2013**.
